# Supplementary material for: Green Synthesis of High Temperature Stable Anatase Titanium Dioxide Nanoparticles Using Gum Kondagogu: Characterization and Solar Driven Photocatalytic Degradation of Organic Dye
Source: MDPI journal article supplement (doi:10.3390/nano8121002), 2018-12-04
Supplement: s1 [file s1]

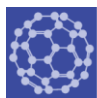

Article

# Green Synthesis of High Temperature Stable Anatase Titanium Dioxide Nanoparticles Using Gum Kondagogu: Characterization and Solar Driven Photocatalytic Degradation of Organic Dye

Saranya K.S. <sup>1</sup>, Vinod Vellora Thekkae Padil <sup>2,\*</sup>, Chandra Senan <sup>3</sup>, Rajendra Pilankatta <sup>4</sup>, Saranya K. <sup>1</sup>, Bini George <sup>1,\*</sup>, Stanisław Waclawek <sup>2</sup> and Miroslav Černík <sup>2,\*</sup>

<sup>1</sup> Department of Chemistry, School of Physical Sciences, Central University of Kerala, Kerala 671316, India; sharanyacks@gmail.com (S.K.S.); kunjumonsaranya916@gmail.com (S.K.)

<sup>2</sup> Institute for Nanomaterials, Advanced Technologies and Innovation (CXI), Technical University of Liberec (TUL), Studentská 1402/2, 46117 Liberec 1, Czech Republic; stanislav.waclawek@tul.cz

<sup>3</sup> Centre for Water Soluble Polymers, Applied Science, Faculty of Arts, Science and Technology, Wrexham Glyndwr University, Wrexham LL11 2AW, Wales, U.K.; c.senan@glyndwr.ac.uk

<sup>4</sup> Department of Biochemistry and Molecular Biology, School of Biological Sciences, Central, University of Kerala, Kerala 671316, India; praj74@gmail.com

\* Correspondence: vinod.padil@tul.cz (V.V.T. P); binigeorgek@gmail.com (B.G.); miroslav.cernik@tul.cz (M.Č.); Tel.: +420-723-372-911 (V.V.T. P & M.Č.)

Received: 28 October 2018; Accepted: 01 December 2018; Published: December 2018

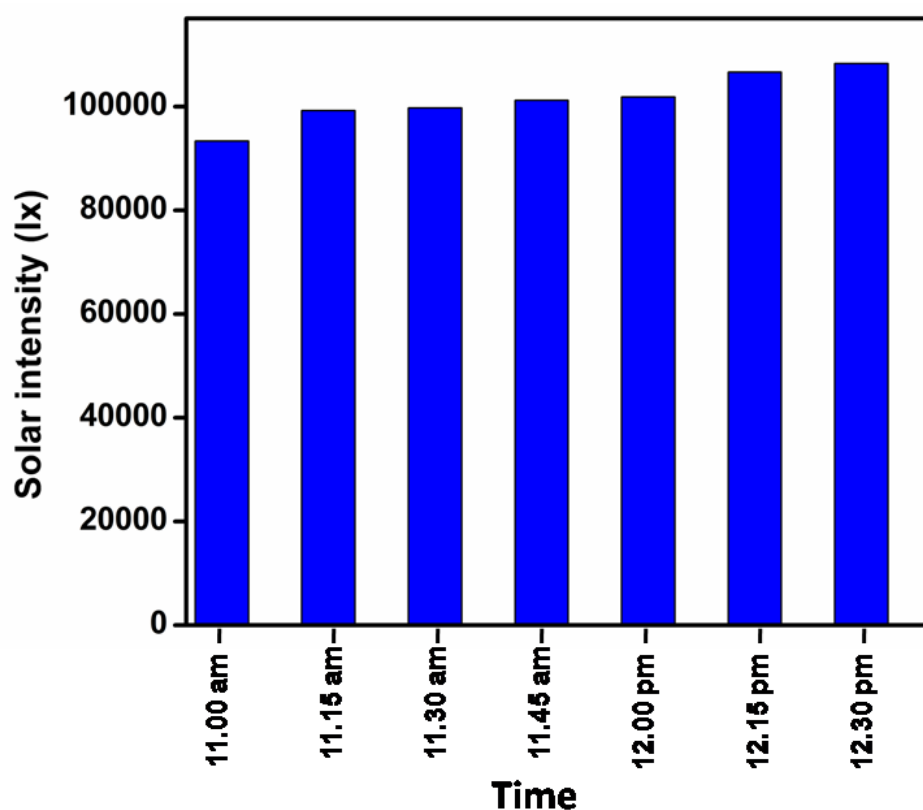

Figure S1. The intensity of solar light measured throughout the experiment (range 100,000 Lux).

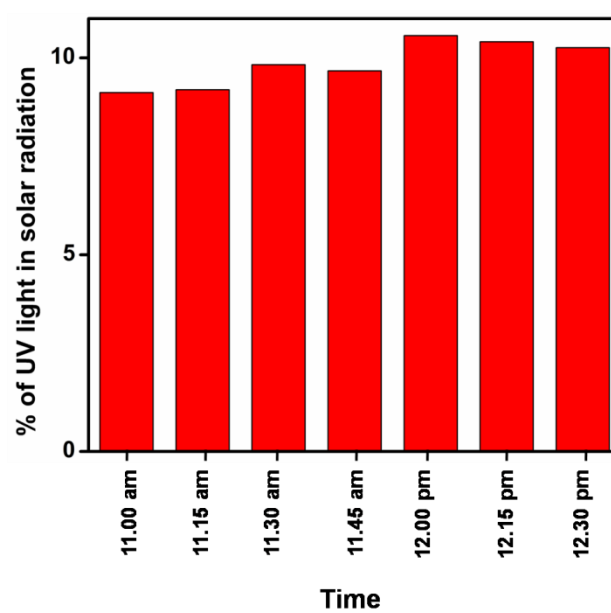

**Figure S2.** The % of UV intensity in solar radiation at various intervals of time.

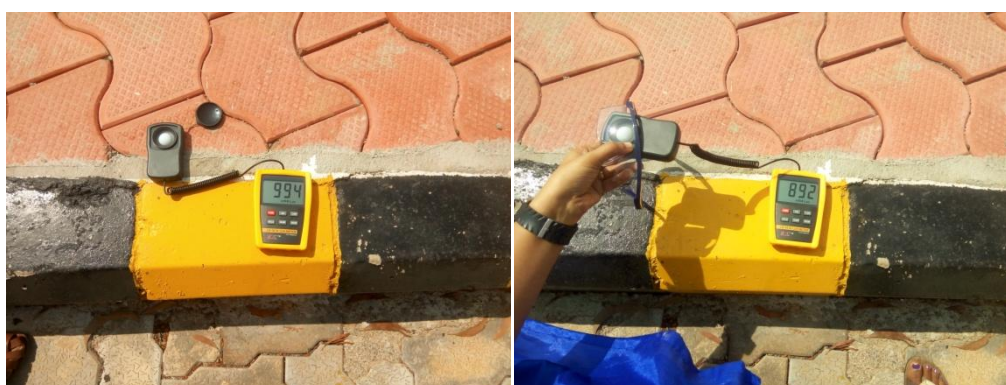

**Figure S3.** The solar UV intensity measurement using Lux meter and UV filtering goggles.

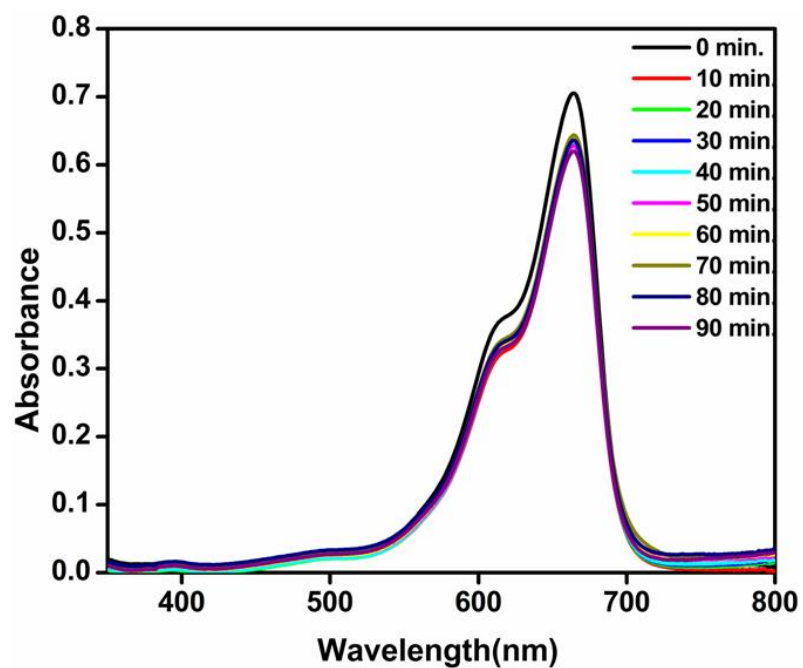

**Figure S4.** UV-visible spectra of MB over various time intervals after treatment with  $\text{TiO}_2$  nanocatalyst under dark condition.

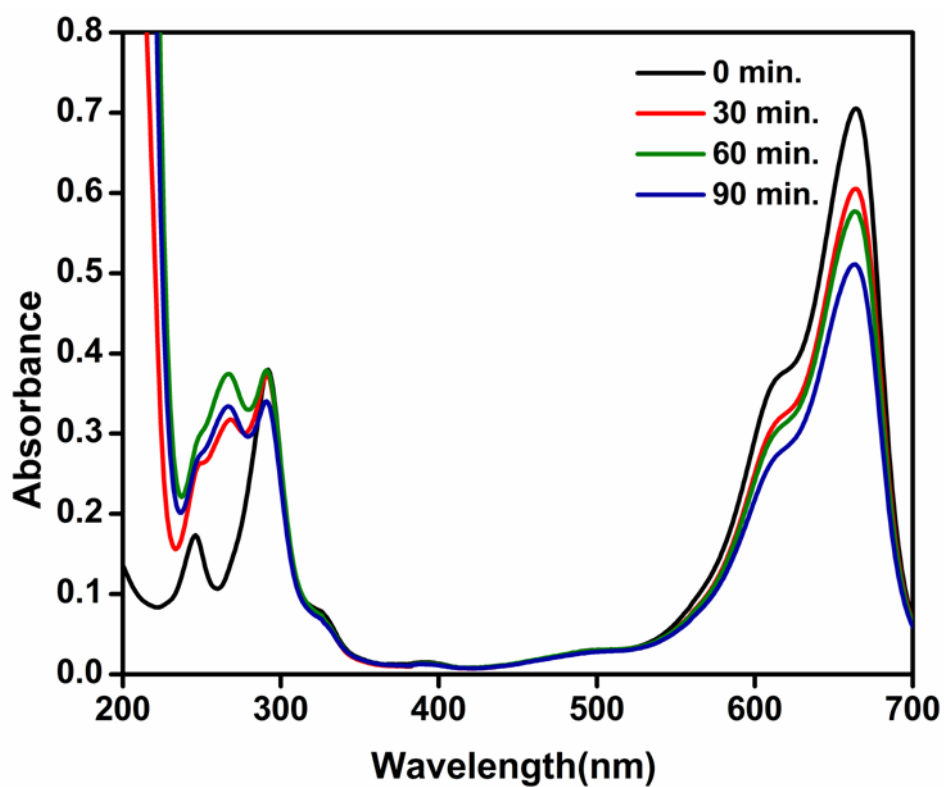

**Figure S5.** UV-visible spectra of MB over various time intervals in the absence of  $\text{TiO}_2$  nanocatalyst.
